# Supplementary material for: Increased and prolonged human norovirus infection in RAG2/IL2RG deficient gnotobiotic pigs with severe combined immunodeficiency
Source: Springer Nature journal article supplement (doi:10.1038/srep25222), 2016-04-27
Supplement: 41598_2016_BFsrep25222_MOESM1_ESM.pdf [file 41598_2016_BFsrep25222_MOESM1_ESM.pdf]

# Supplementary Information for

## **Increased and prolonged human norovirus infection in RAG2/IL2RG deficient gnotobiotic pigs with severe combined immunodeficiency**

Shaohua Lei<sup>1,\*</sup>, Junghyun Ryu<sup>2,\*</sup>, Ke Wen<sup>1</sup>, Erica Twitchell<sup>1</sup>, Tammy Bui<sup>1</sup>, Ashwin Ramesh<sup>1</sup>,  
Mariah Weiss<sup>1</sup>, Guohua Li<sup>1</sup>, Helen Samuel<sup>1</sup>, Sherrie Clark-Deener<sup>3</sup>, Xi Jiang<sup>4</sup>,  
Kiho Lee<sup>2,+</sup>, Lijuan Yuan<sup>1,+</sup>

<sup>1</sup>Department of Biomedical Sciences and Pathobiology, Virginia-Maryland College of Veterinary Medicine, Virginia Tech, Blacksburg, VA 24061, USA.

<sup>2</sup>Department of Animal and Poultry Sciences, College of Agriculture and Life Sciences, Virginia Tech, Blacksburg, VA 24061, USA.

<sup>3</sup>Department of Large Animal Clinical Sciences, Virginia-Maryland College of Veterinary Medicine, Virginia Tech, Blacksburg, VA 24061, USA.

<sup>4</sup>Division of Infectious Diseases, Cincinnati Children's Hospital Medical Center, Cincinnati, OH 45229, USA.

\*These authors contributed equally to this work.

+Correspondence and requests for materials should be addressed to K.L. (email: kiholee@vt.edu) or L.Y. (email: lyuan@vt.edu).

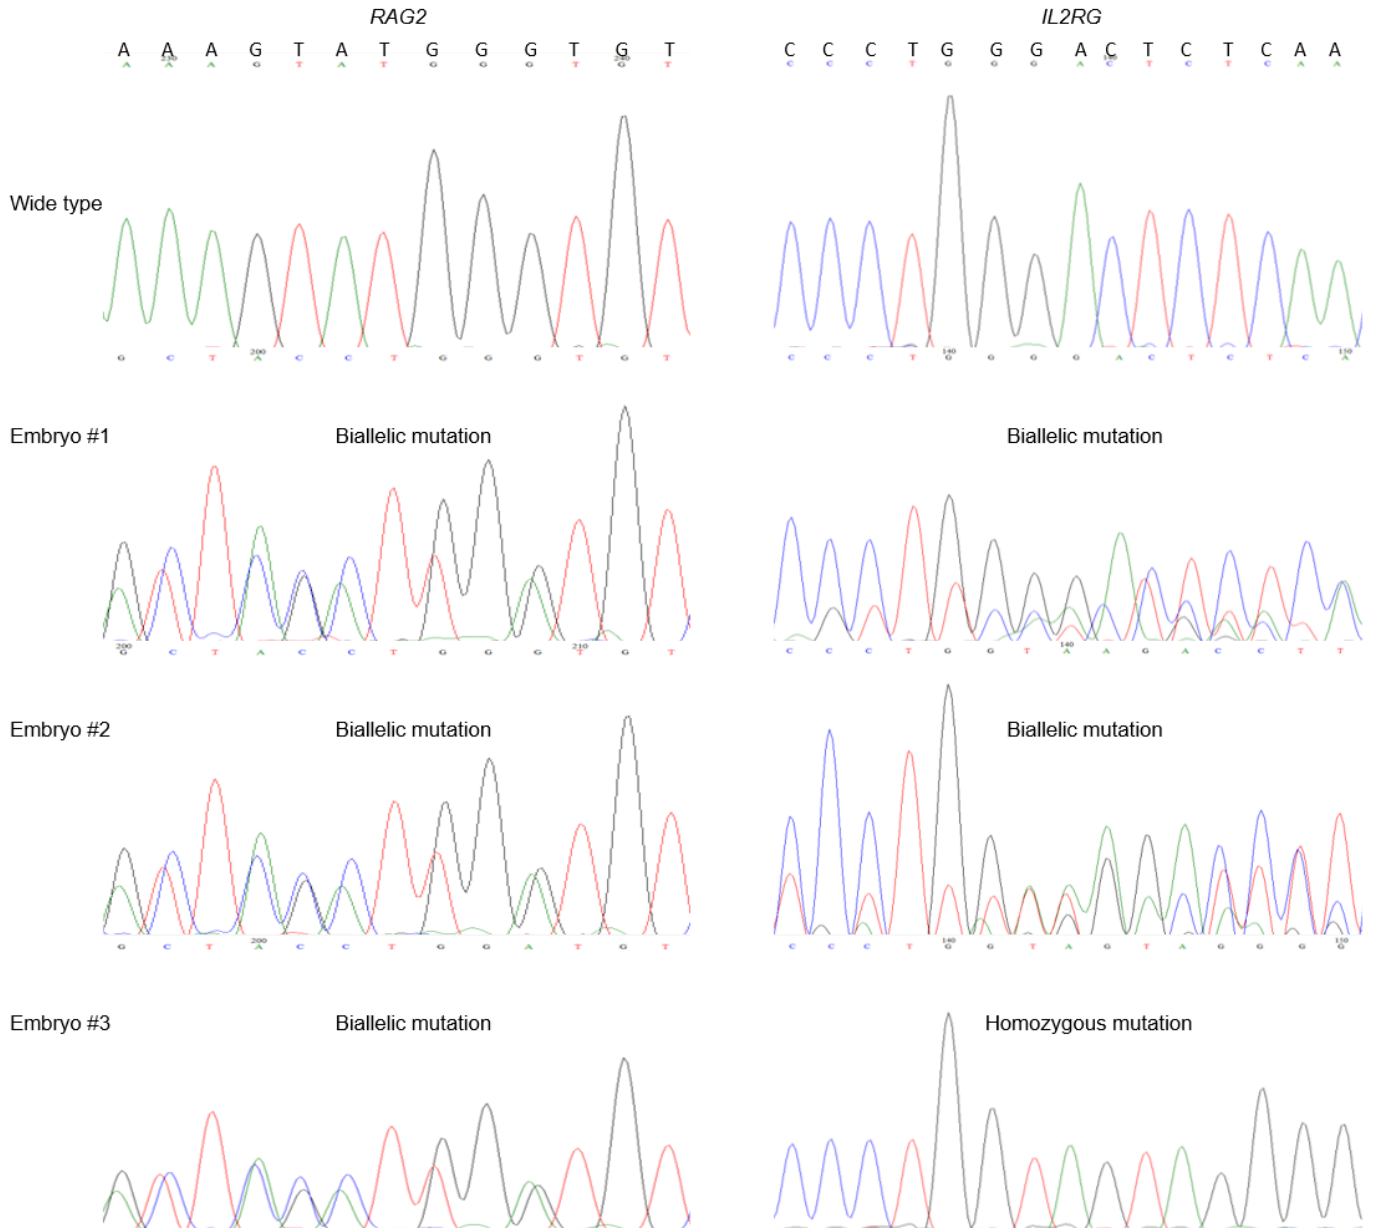

**Supplementary Figure 1. Types of genetic mutations induced by CRISPR/Cas9 system.**

Representative images of sequencing readings from individual blastocysts showing mutations on *RAG2* and *IL2RG*.

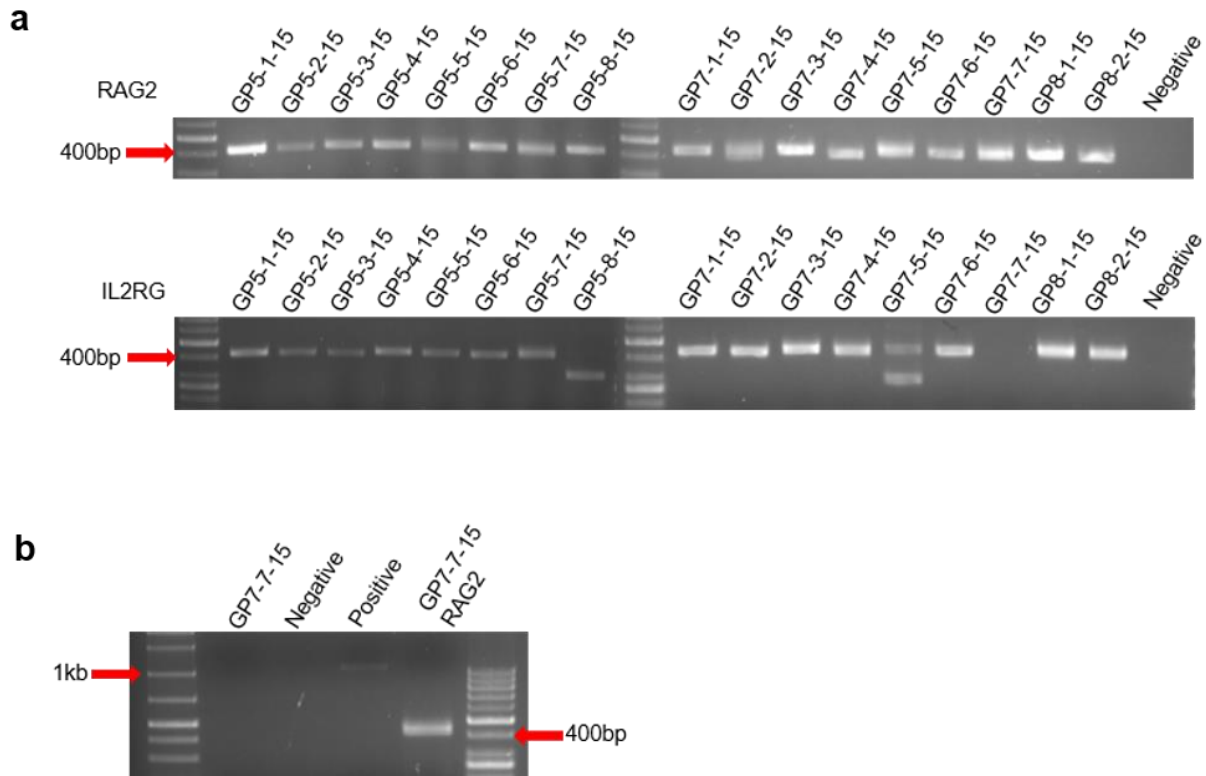

**Supplementary Figure 2. PCR amplicons to genotype RAG2/IL2RG deficient pigs.** (a) Gel images showing PCR products which flank projected cutting sites of *RAG2* and *IL2RG* by the CRISPR/Cas9 system; *IL2RG* was not amplified from genomic DNA of pig GP7-7-15. Genomic DNA templates of newborn pigs were purified from tail tissues, which were obtained at 1 day of age. (b) PCR amplification to identify larger deletion of *IL2RG* in pig GP7-7-15. There was no amplification of *IL2RG* from pig GP7-7-15 using a primer set that amplifies 417 bp from WT pig DNA. When a new set of primers were used to amplify over 1kb of *IL2RG*, still no PCR product was detected. A fragment of *RAG2* was amplified from the same genomic DNA, indicating the quality of the genomic DNA was not compromised. A wild type pig genomic DNA was used as positive control PCR.

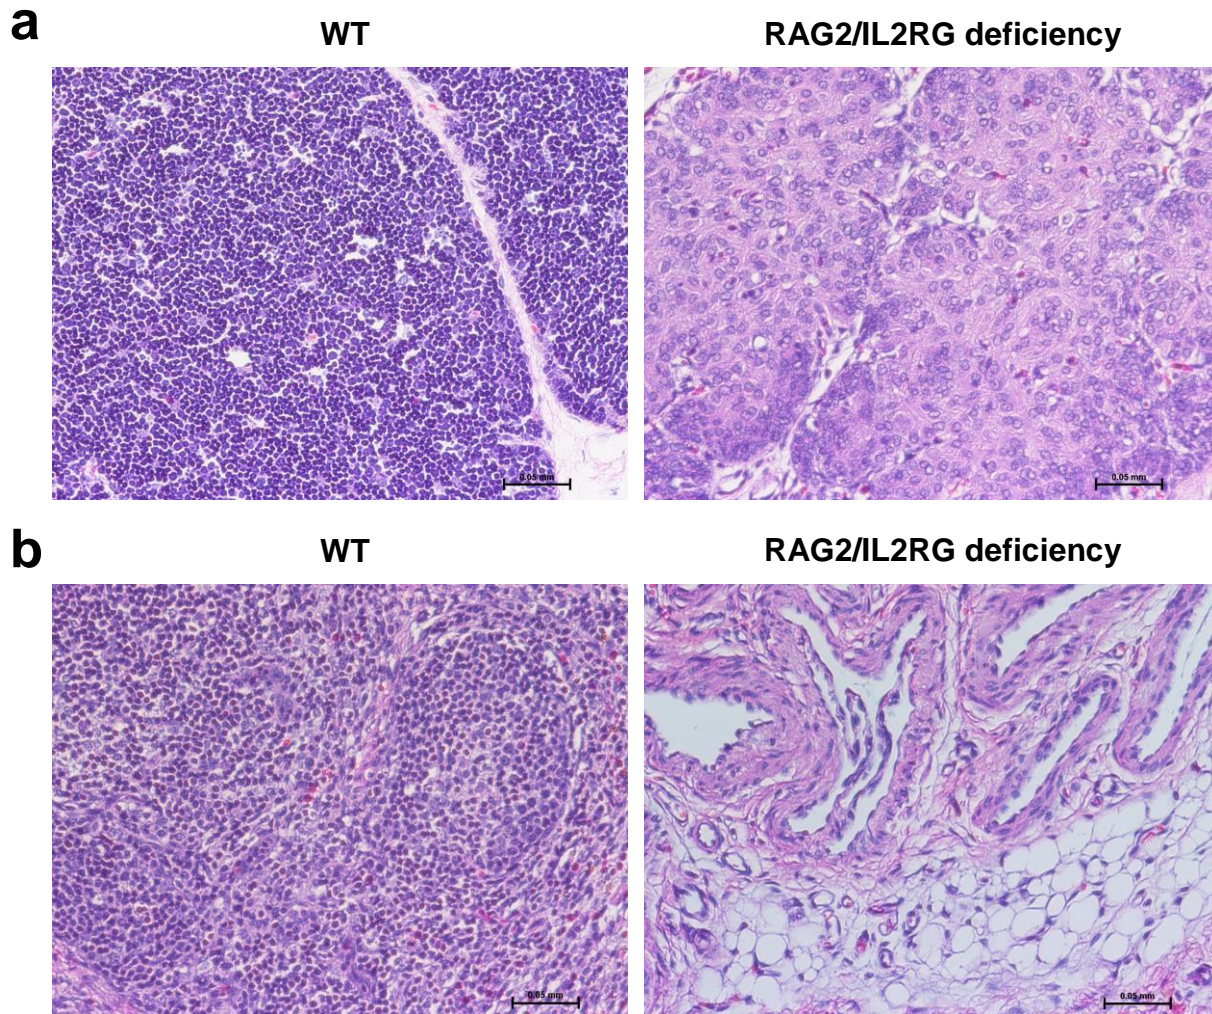

**Supplementary Figure 3. Lack of lymphocytes in thymus and mesentery in some RAG2/IL2RG deficient pigs.** (a) Representative images of H&E stained sections showing lack of lymphocytes within observed thymus in a RAG2/IL2RG deficient pig (right), while thymuses were populated with lymphocytes in WT pigs (left). (b) Representative images of H&E stained sections showing lack of lymphocytes within mesenteric tissue in a RAG2/IL2RG deficient pig (right), while mesenteric lymph nodes were populated with lymphocytes in WT pigs (left). Scale bar, 50  $\mu$ m.



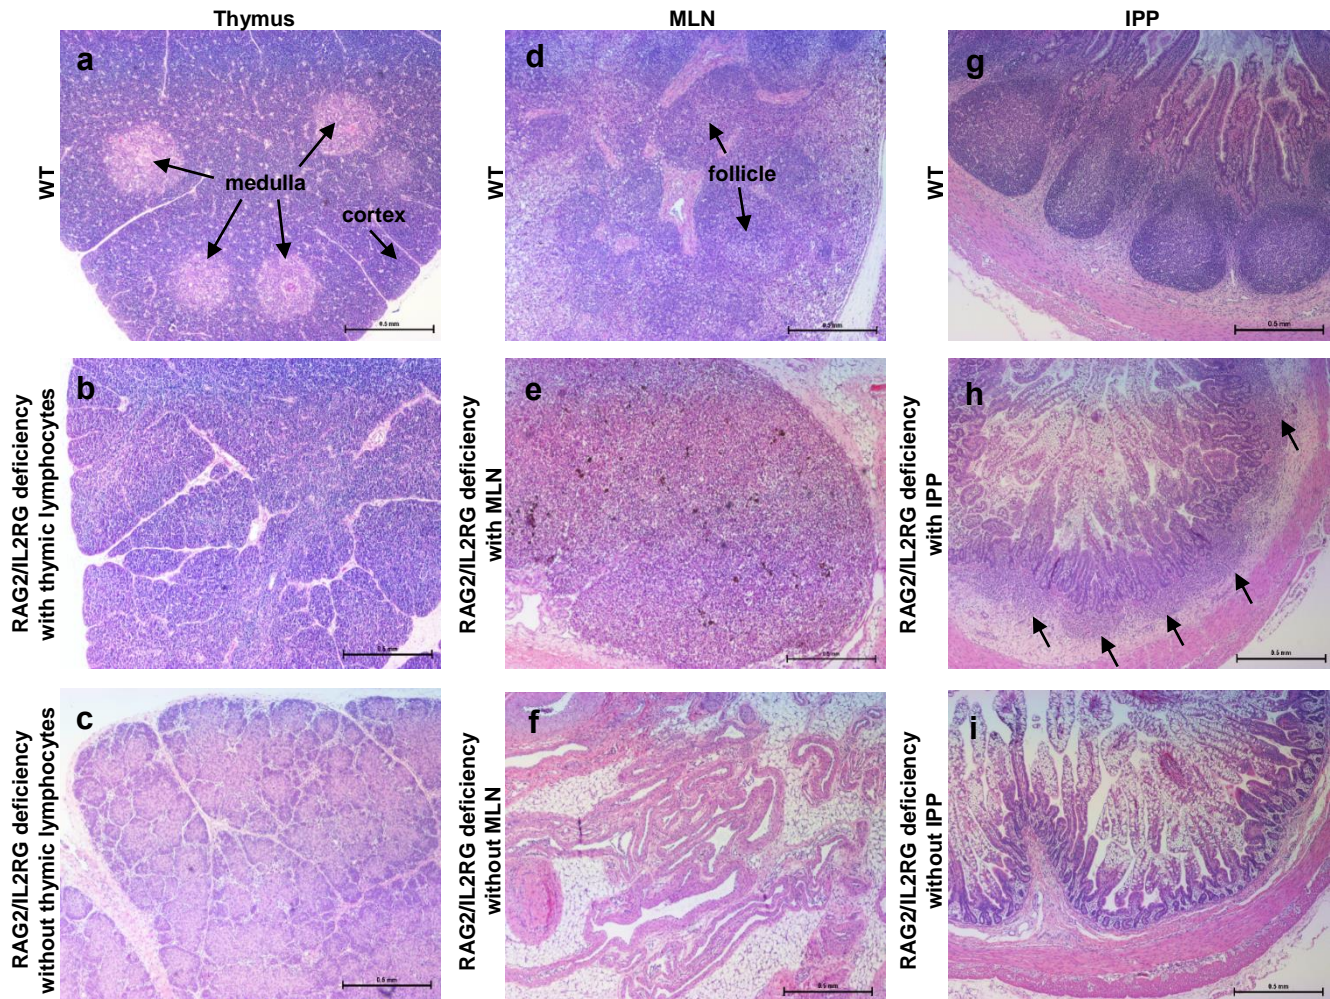

**Supplementary Figure 4. Abnormal morphology of thymus, MLN, and IPP in RAG2/IL2RG deficient pigs.** Representative images of H&E stained sections showing abnormal structure of thymus (left panel), MLN (middle panel), and IPP (right panel) in RAG2/IL2RG deficient pigs at 34 days of age. **(a)** Histologically normal thymus from a WT pig with defined cortex and medulla. Thymus from RAG2/IL2RG deficient pigs with lymphocytes but no distinction between cortex and medulla **(b)** or without lymphocytes **(c)**. **(d)** Histologically normal MLN from a WT pig. **(e)** MLN from RAG2/IL2RG deficient pigs without defined cortical or medullary lymphoid tissue. **(f)** Mesentery without MLN from a RAG2/IL2RG deficient pig. **(g)** Normal IPP from WT pigs. **(h)** Poorly developed and unstructured small IPP indicated by arrows in RAG2/IL2RG deficient pigs. **(i)** Ileum without IPP from a RAG2/IL2RG deficient pig. Scale bar, 0.5 mm.

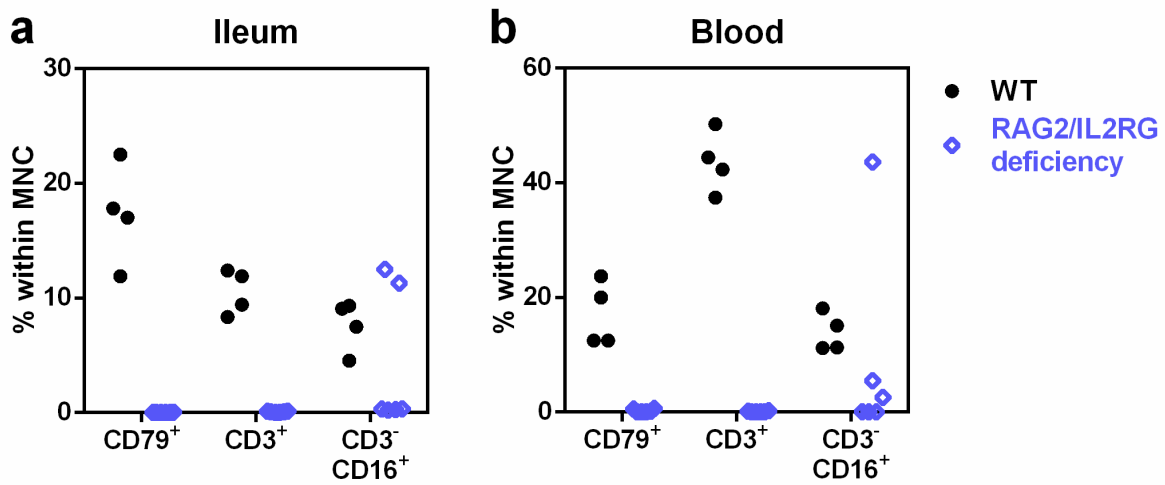

**Supplementary Figure 5. Proportion of B cells (CD79<sup>+</sup>), T cells (CD3<sup>+</sup>), and NK cells (CD3<sup>-</sup> CD16<sup>+</sup>) within MNC.** The frequency of B cells, T cells, and NK cells within MNC from ileum (**a**) and blood (**b**) were quantified by flow cytometry for WT ( $n = 4$ ) and RAG2/IL2RG deficient pigs ( $n = 6$ ). Data are presented as individual animal data points.

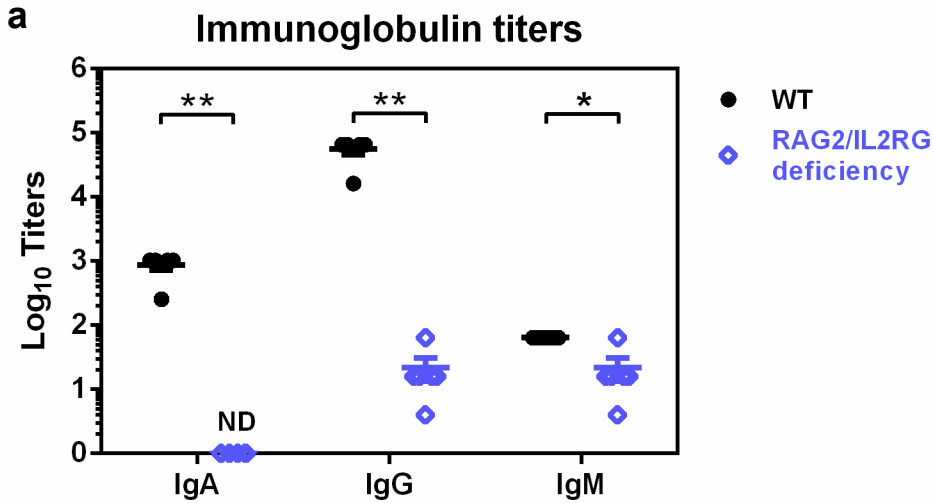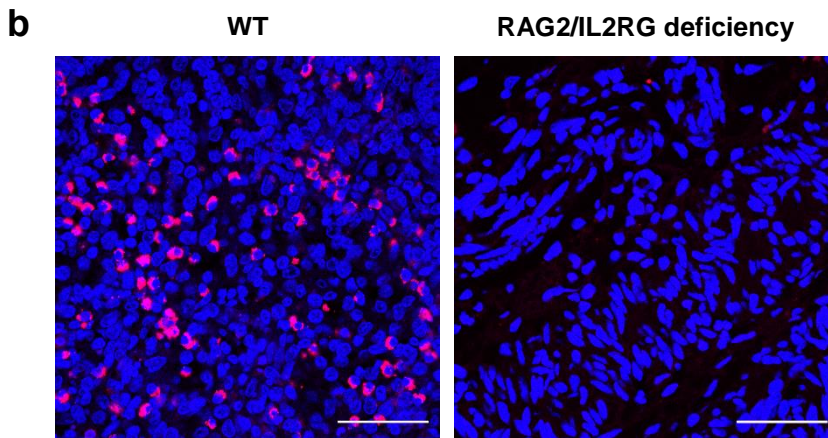

**Supplementary Figure 6. Depletion of B cells in RAG2/IL2RG deficient pigs at 34 days of age.** (a) Immunoglobulin titers in serum were determined by ELISA in WT ( $n = 5$ ) and RAG2/IL2RG deficient pigs ( $n = 6$ ). Data are presented as means  $\pm$  s.e.m. with individual animal data points. Statistical significance was determined by Mann-Whitney test.  $*P < 0.05$ ,  $**P < 0.01$ . (b) Mesentery tissue sections from WT and RAG2/IL2RG deficient pigs were stained to detect B cells (CD79<sup>+</sup>, red) with counter staining of cell nuclei (DAPI, blue). Scale bar, 50  $\mu$ m.

**a**

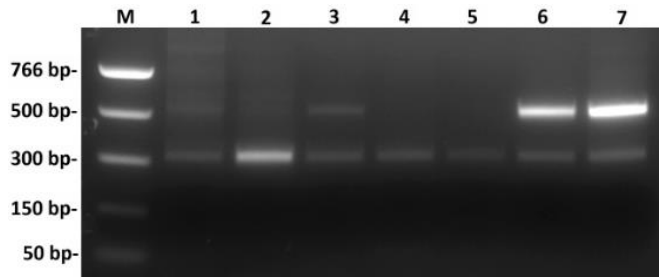

**b**

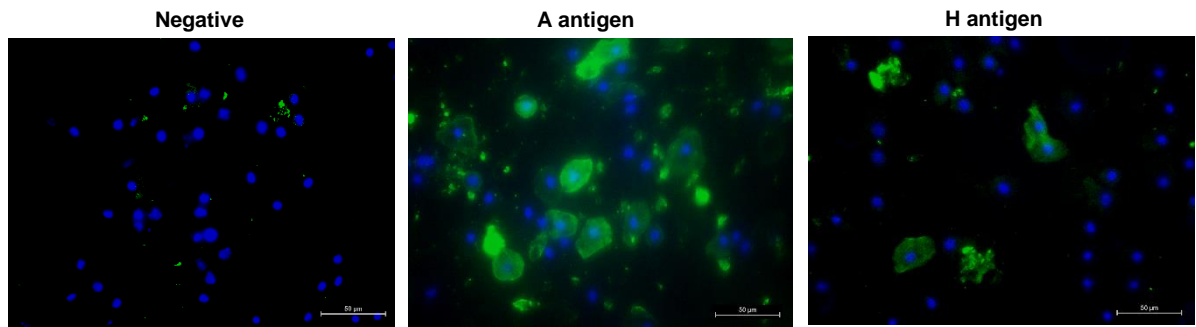

**Supplementary Figure 7. HBGA typing of Gn pigs by PCR and immunofluorescence assay.**

(a) Pigs were determined to be A<sup>+</sup> or A<sup>-</sup> by PCR using genomic DNA from blood. Representative gel image showing A<sup>+</sup> samples with a 500 bp PCR product in addition to a 300 bp PCR internal control (Lane 1, 3, 6, 7). (b) Buccal cells were fixed on glass slides and stained for A or H antigen (FITC, green) and nuclei (DAPI, blue). Representative images indicate HBGA A<sup>-</sup> and H<sup>-</sup>, A<sup>+</sup>, and H<sup>+</sup> pigs. Scale bar, 50 µm.



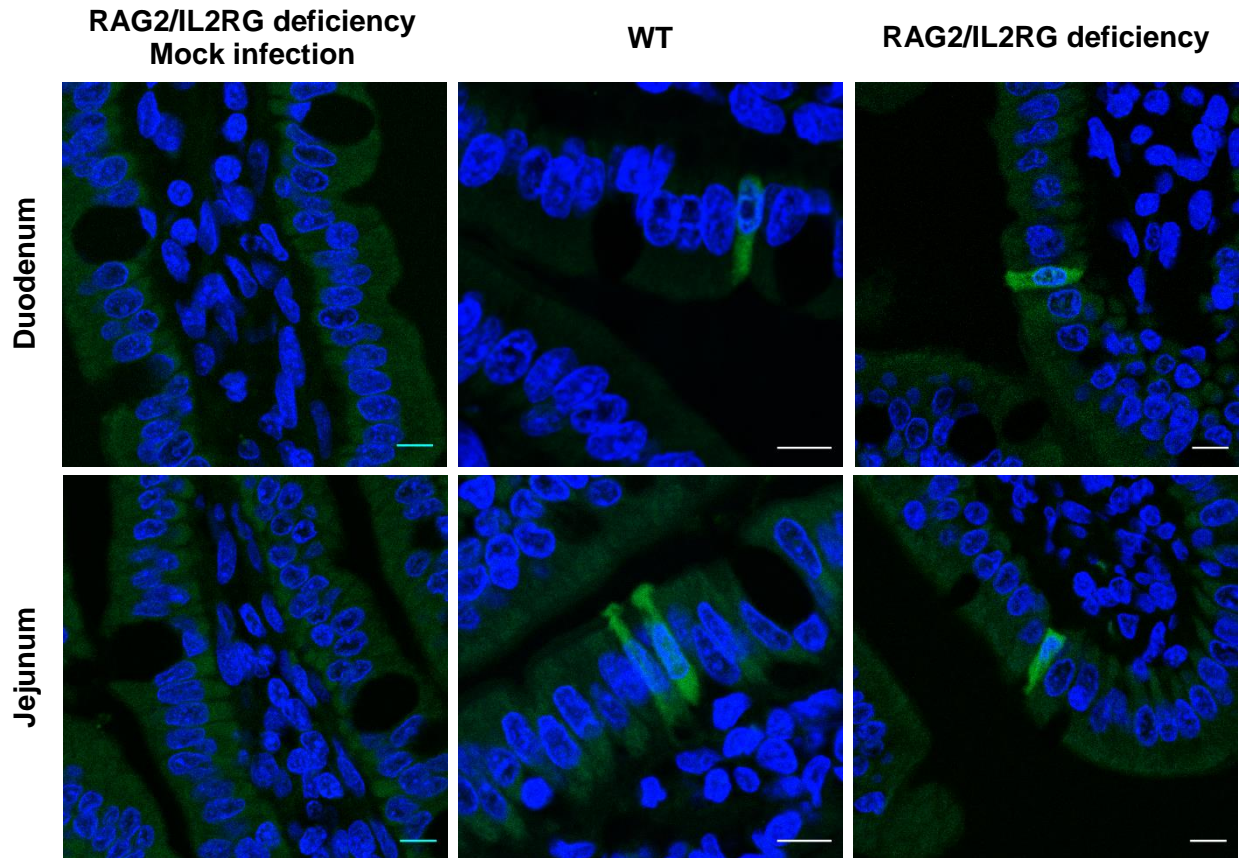

**Supplementary Figure 8. HuNoV infection of enterocytes in Gn pigs.** Immunohistochemistry of duodenum (upper panel) and jejunum (lower panel) from pigs euthanized on PID3 for HuNoV capsid protein (bright green) and cell nuclei (blue). Representative images showing HuNoV infection of enterocytes in WT and RAG2/IL2RG deficient pigs. Scale bar, 10  $\mu$ m.

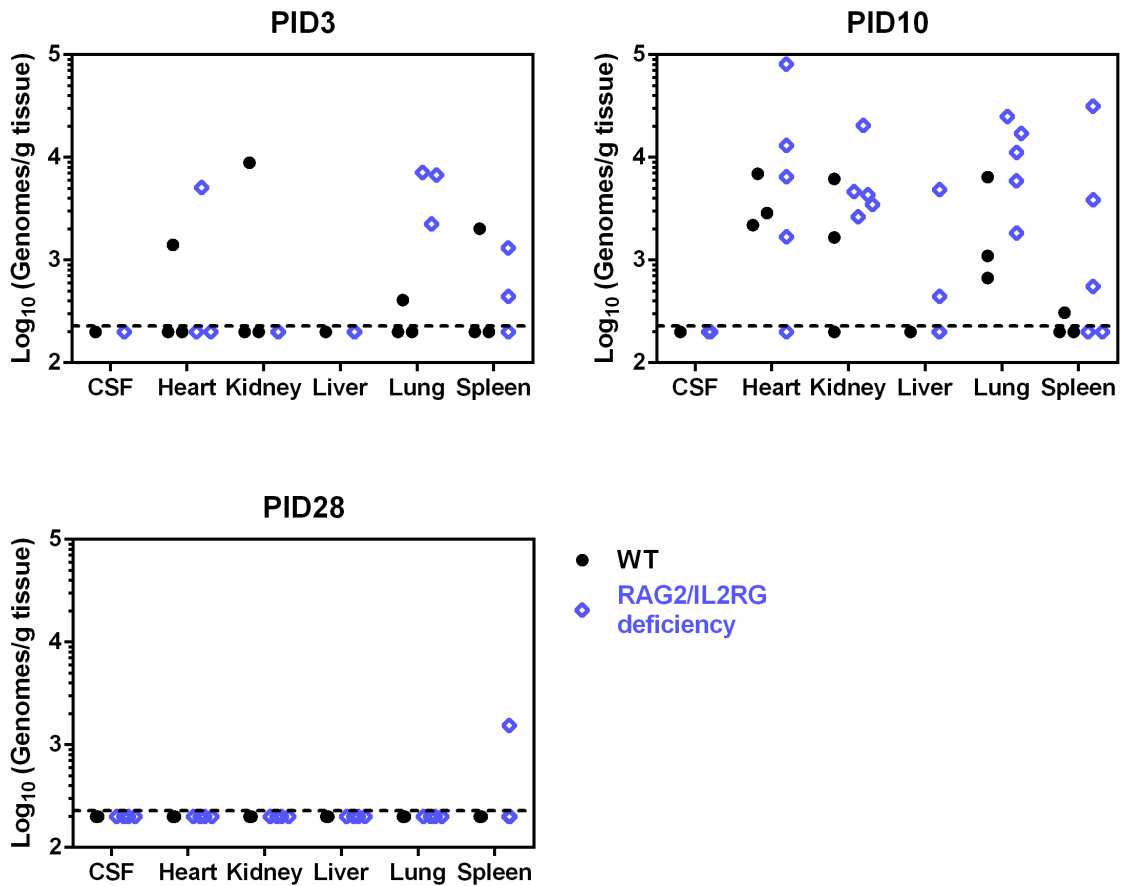

**Supplementary Figure 9. HuNoV genomes in extraintestinal tissues in Gn pigs.** HuNoV genomes in CSF (cerebrospinal fluid), heart, kidney, liver, lung, and spleen in WT and RAG2/IL2RG deficient pigs euthanized on PID3, PID10, and PID28 were measured by qRT-PCR. WT groups, PID3  $n=3$ , PID10  $n=3$ , PID  $n=5$ ; RAG2/IL2RG deficiency groups, PID3  $n=3$ , PID10  $n=5$ , PID  $n=4$ . Dashed line indicates limit of detection. Data are presented as individual animal data points.

**Supplementary Table 1. Optimization of CRISPR/Cas9 system to induce mutations during embryogenesis.** To minimize potential cytotoxicity, CRISPR/Cas9 RNAs were introduced into pig zygotes at four different concentrations, and their effectiveness of introducing mutations on *RAG2* was examined by genotyping blastocysts. Concentrations of 2.5 ng  $\mu\text{l}^{-1}$  sgRNA and 5 ng  $\mu\text{l}^{-1}$  Cas9 mRNA was used for all subsequent studies.

| Concentration of CRISPR/Cas9 (ng/ $\mu\text{l}$ ) | Total # of embryos injected | % of blastocyst on day 7 (number of blastocysts/cleaved) | # of blastocyst genotyped | Genotypes           |                    |                 |                       |     |
|---------------------------------------------------|-----------------------------|----------------------------------------------------------|---------------------------|---------------------|--------------------|-----------------|-----------------------|-----|
|                                                   |                             |                                                          |                           | Homozygous mutation | Biallelic mutation | Mosaic mutation | Heterozygous mutation | WT  |
| 10/20                                             | 49                          | 18.91% (7/37)                                            | 5                         | 2                   | 2                  | 1               | 0                     | 0   |
| 2.5/5                                             | 41                          | 30.00% (9/30)                                            | 4                         | 1                   | 3                  | 0               | 0                     | 0   |
| 1/2                                               | 42                          | 41.66% (10/24)                                           | 4                         | 0                   | 1                  | 1               | 0                     | 2   |
| 0.5/1                                             | 41                          | 33.33% (10/30)                                           | 5                         | 0                   | 2                  | 0               | 3                     | 0   |
| 0/0 (water)                                       | 39                          | 41.93% (13/31)                                           | N/A                       | N/A                 | N/A                | N/A             | N/A                   | N/A |

**Supplementary Table 2. *In vitro* targeting of *RAG2* and *IL2RG*.** Using the optimized concentration of sgRNA and Cas9 mRNA, *RAG2* and *IL2RG* were targeted simultaneously *in vitro*. Among the six genotyped blastocysts, mutations on both *RAG2* and *IL2RG* were detected, and no wild type sequence was found.

| Targeted gene | Total # of embryos injected | Cleaved | % of blastocyst on day 7 (number of blastocyst/cleaved) | # of blastocyst genotyped | Genotypes           |                    |                 |                       |    |
|---------------|-----------------------------|---------|---------------------------------------------------------|---------------------------|---------------------|--------------------|-----------------|-----------------------|----|
|               |                             |         |                                                         |                           | Homozygous mutation | Biallelic mutation | Mosaic mutation | Heterozygous mutation | WT |
| <i>RAG2</i>   | 200                         | 155     | 36.7% (57/155)                                          | 6                         | 0                   | 5                  | 1               | 0                     | 0  |
| <i>IL2RG</i>  |                             |         |                                                         |                           | 2                   | 4                  | 0               | 0                     | 0  |

**Supplementary Table 3. Generation of *RAG2/IL2RG* deficient pigs.** Five embryo transfers were conducted on day 5 or 6 using five surrogate sows, a total of seventeen piglets were generated from the three pregnant surrogates.

| Surrogate ID | # of embryos generated | # of embryos transferred into a recipient | Pregnancy | # of piglets |
|--------------|------------------------|-------------------------------------------|-----------|--------------|
| 342          | 318                    | 70 (day 6)                                | No        | -            |
| 343          | 308                    | 132 (day 5)                               | Yes       | 8            |
| 347          | 301                    | 77 (day 6)                                | No        | -            |
| 356          | 283                    | 151 (day 5)                               | Yes       | 7            |
| 348          | 295                    | 165 (day 5)                               | Yes       | 2            |



**Supplementary Table 4. Genotyping result of RAG2/IL2RG deficient pigs.** Bold letters indicate insertion or change in nucleotides, and ‘-’ indicates deletion of a nucleotide. All piglets carried mutations on both *RAG2* and *IL2RG*.

| Pig ID    | <i>RAG2</i>                                                                                                                 |                                 | <i>IL2RG</i>                                                                                                           |                              |
|-----------|-----------------------------------------------------------------------------------------------------------------------------|---------------------------------|------------------------------------------------------------------------------------------------------------------------|------------------------------|
|           | DNA                                                                                                                         | Predicted Amino Acid            | DNA                                                                                                                    | Predicted Amino Acid         |
| Wild type | TGATGTCGTGTATAGTCGAGGAAAAGTATGGGTGTTCTCTTT                                                                                  | +/+                             | CTCTCTACACCCCTGGGACTCTCAACGTTTCCACTCTACCCC                                                                             | +/+ or +/- Y                 |
| GP5-1-15  | TGATGTCGTGTATAGTCGAGGG-----TGTTCTCTTT<br>TGATGTCGTGTATAGTCGAGGG-----TTCTCTTT                                                | Δ150-527/ Δ150-527              | CTCTCTACACCCCT--GGACTCTCAACGTTTCCACTCTACCCC                                                                            | Δ49-368/ Δ49-368             |
| GP5-2-15  | TGATGTCGTGTATAGTC-----GTATGGGTGTTCTCTTT                                                                                     | Δ149-151/ Δ149-151              | CTCTCTACACC— <b>AC</b> -----CTCTCAACGTTTCCACTCTACCCC                                                                   | Δ48, 49/ Y                   |
| GP5-3-15  | TGATGTCGTGTATAGTCGAGGG <b>A</b> AAAAGTATGGGTGTTCTCTTT                                                                       | Δ151-527/ Δ151-527              | CTCTCTACACCCC-----CTCTCAACGTTTCCACTCTACCCC                                                                             | Δ48, 49/ Y                   |
| GP5-4-15  | TGATGTCGTGTATAGTCGAGGG <b>A</b> AAAAGTATGGGTGTTCTCTTT                                                                       | Δ151-527/ Δ151-527              | CTCTCTACACCCCTG <b>TGG</b> ACTCTCAACGTTTCCACTCTACCCC<br>CTCTCTACACCCCTGG <b>AA</b> ACTCTCAACGTTTCCACTCTACCCC           | Δ47-368 / Δ48-368            |
| GP5-5-15  | TGATGTCGTGTAT-----GGGTGTTCTCTTT<br>TGATGTCGT-----GTATGGGTGTTCTCTTT<br>TGATGTCGTGTATAGTCGAGGG <b>A</b> AAAAGTATGGGTGTTCTCTTT | Δ147-527/ Δ147-527/<br>Δ151-527 | CTCTCTACACCCC— <b>T-AC</b> ACTCTCAACGTTTCCACTCTACCCC                                                                   | Δ47-368/ Δ47-368             |
| GP5-6-15  | TGATGTCGTGTATAGTCGAGGG--AAAGTATGGGTGTTCTCTTT<br>TGATGTCGTGTATAGTCGAGGGAAAA--TATGGGTGTTCTCTTT                                | Δ151-527/Δ151-527               | CTCTCTACACC---- <b>T</b> -----CTCTCAACGTTTCCACTCTACCCC                                                                 | Δ47-368/ Y                   |
| GP5-7-15  | TGATGTCGTGTATAGTC-----TCTCTTT<br>TGATGTCGTGTATAGTCGA-----GGGTGTTCTCTTT                                                      | Δ148-527/Δ151-527               | CTCTCTACACCCC-----TCAACGTTTCCACTCTACCCC<br>CTCTCTACACCCCT--GGACTCTCAACGTTTCCACTCTACCCC                                 | Δ47-49/ Δ49-368/ Y           |
| GP5-8-15  | TGATGTCGTGTATAGTCGAGGG <b>A</b> AAAAGTATGGGTGTTCTCTTT                                                                       | Δ151-527/ Δ151-527              | <b>27bp deletion</b> -GGG <b>A</b> ACTCTCAACGTTTCCACTCTACCCC                                                           | Δ39-368/ Δ39-368             |
| GP7-1-15  | TGATGTCGTGTATAGTCGAGGG <b>AAAA</b> AAAAGTATGGGTGTTCTCTTT                                                                    | Δ151-527/ Δ151-527              | CTCTCTACACCCCT--GGACTCTCAACGTTTCCACTCTACCCC                                                                            | Δ49-368/ Y                   |
| GP7-2-15  | TGATGTCGTGTATAGTCGAGGG <b>AGAACCCATA</b> TGTTCTCTTT<br>TGATGTCGTGTATAGTCGA----- <b>28bp deletion</b> --                     | Δ150-527/ Δ149-527              | CTCTCTACACCCCT-----CAACGTTTCCACTCTACCCC<br>CTCTCTACACCCC-----TCTCAACGTTTCCACTCTACCCC                                   | Δ48-368/ Δ47-368/ Y          |
| GP7-3-15  | TGATGTCGTGTATAGTCGAGGG <b>ACT</b> AAAAGTATGGGTGTTCTCTTT<br>TGATGTCGTGTATAGTCGAGGG <b>AAATAT</b> AGTATGGGTGTTCTCTTT          | Δ150-527/ 151Y                  | CTCTCTACAC <b>TCCTGCTCTCTACACC</b> CTCTCAACGTTTCCACTCTACCCC<br>CTCTCTACACCCCTGG--ACTCTCAACGTTTCCACTCTACCCC             | Δ41-368/ Δ49-368             |
| GP7-4-15  | TGATGTCGT-----GTATGGGTGTTCTCTTT                                                                                             | Δ147-527/ Δ147-527              | CTCTCTACACCCCTGGG <b>GTGTAC</b> ACTCTCAACGTTTCCACTCTACCCC<br>CTCTCTACACCCCTGGG <b>GTGTACC</b> CTCTCAACGTTTCCACTCTACCCC | 49Y, 50Y / T49Y,<br>50Y, 51P |
| GP7-5-15  | TGATGTCGTGTATAGTCGAGG-----TATGGGTGTTCTCTTT<br>TGATGTCGTGTATAGTCGAGGG <b>TGTTCCCA</b> ACCAGGGTGTCTCTTT                       | Δ150, 151/ Δ150-527             | CTCTCTACACCCCTG <b>TTG</b> AGACTCTCAACGTTTCCACTCTACCCC<br>-----45bp deletion-----ACTCTACCCC                            | 48V, G49E/ Δ39-53            |
| GP7-6-15  | TGATGTCGTGTATAGTCG----- <b>ACT</b> ATGGGTGTTCTCTTT                                                                          | Δ149-527/ Δ149-527              | CTCTCTACACCCC-----CTCTCAACGTTTCCACTCTACCCC                                                                             | Δ48, 49/ Δ48, 49             |
| GP7-7-15  | TGATGTCGTGTATAGTCGA-----GGGTGTTCTCTTT<br>TGATGTCGTGTATAGTCGAGG-----TATGGGTGTTCTCTTT                                         | Δ150-527/ Δ150, 151             | No amplification                                                                                                       | N/A                          |
| GP8-1-15  | TGATGTCGTGTATAGTCGAGGAAA <b>G</b> AGTATGGGTGTTCTCTTT<br>TGATGTCGTGTATAGTCGAGGAAAA <b>AA</b> GTATGGGTGTTCTCTTT               | Δ151-527/ Δ151-527              | CTCTCTACACCCCTGG <b>TAG</b> ACTCTCAACGTTTCCACTCTACCCC<br>CTCTCTAC-----ACTCTCAACGTTTCCACTCTACCCC                        | Δ49-368/ Δ46-368             |
| GP8-2-15  | TGATGTCGTGTATAGTCGAGGG <b>A</b> AAAAGTATGGGTGTTCTCTTT                                                                       | Δ151-527/ Δ151-527              | CTCTCTACAC-----TCTCAACGTTTCCACTCTACCCC<br>CTCTCTACACCCC-----CTCTCAACGTTTCCACTCTACCCC                                   | Δ46-368/ Δ48, 49             |

**Supplementary Table 5. Genotypes and phenotypes of RAG2/IL2RG deficient pigs.**

| Pig ID    | Gender | RAG2                    | IL2RG                   | Thoracic thymus <sup>a</sup> | Cervical thymus <sup>a</sup> | MLN <sup>b</sup> | IPP <sup>c</sup> | HBGA type <sup>d</sup> | General health    | Age on euthanasia |
|-----------|--------|-------------------------|-------------------------|------------------------------|------------------------------|------------------|------------------|------------------------|-------------------|-------------------|
| Gp5-2-15* | M      | Homozygous <sup>#</sup> | Hemizygous <sup>#</sup> | +                            | -                            | ++               | +                | H                      | Normal            | 9 days (PID3)     |
| Gp5-3-15* | M      | Homozygous              | Hemizygous <sup>#</sup> | -                            | -                            | ++               | +                | H                      | Normal            | 9 days (PID3)     |
| Gp5-4-15* | F      | Homozygous              | Biallelic               | -                            | +, ND <sup>e</sup>           | -                | -                | A                      | Normal            | 9 days (PID3)     |
| Gp5-5-15* | F      | Mosaic                  | Homozygous              | -                            | -                            | -                | -                | H                      | Normal            | 16 days (PID10)   |
| Gp5-7-15* | M      | Biallelic               | Mosaic <sup>#</sup>     | ++                           | -                            | ++               | +                | H                      | Normal            | 16 days (PID10)   |
| Gp5-8-15* | F      | Homozygous              | Homozygous              | -                            | -                            | -                | -                | A                      | Normal            | 9 days (mock)     |
| Gp7-1-15* | M      | Homozygous              | Hemizygous              | +, ND                        | ++, ND                       | -                | -                | A                      | Normal            | 34 days (PID28)   |
| Gp7-2-15* | M      | Biallelic               | Mosaic                  | ++, ND                       | ++, ND                       | -                | -                | H                      | Normal            | 34 days (PID28)   |
| Gp7-3-15* | F      | Biallelic <sup>#</sup>  | Biallelic               | +, ND                        | +, ND                        | -                | -                | A                      | Normal            | 34 days (PID28)   |
| Gp7-4-15* | F      | Homozygous              | Biallelic <sup>#</sup>  | ++                           | ++                           | +                | +                | H                      | Normal            | 34 days (PID28)   |
| Gp7-5-15* | F      | Biallelic <sup>#</sup>  | Biallelic <sup>#</sup>  | ++                           | +                            | +                | +                | A                      | Normal            | 17 days (PID10)   |
| Gp7-6-15* | F      | Homozygous              | Homozygous <sup>#</sup> | ++                           | +                            | +                | +                | H                      | Normal            | 17 days (PID10)   |
| Gp7-7-15* | M      | Biallelic <sup>#</sup>  | Hemizygous              | -                            | -                            | -                | -                | H                      | Normal            | 17 days (PID10)   |
| Gp5-1-15  | F      | Biallelic               | Homozygous              | -                            | +, ND                        | -                | -                |                        | Normal            | 9 days (PID3)     |
| GP5-6-15  | M      | Biallelic               | Hemizygous              | -                            | -                            | -                | -                |                        | Failure to thrive | 3 days            |
| Gp8-1-15  | F      | Biallelic               | Biallelic               | -                            | +, ND                        | -                | -                |                        | Normal            | 34 days (PID28)   |
| Gp8-2-15  | F      | Homozygous              | Biallelic <sup>#</sup>  | ++                           | +                            | ++               | -                |                        | Normal            | 34 days (PID28)   |

\* Pigs used in this HuNoV infection study. <sup>#</sup> Pre-mature stop codon was not generated on at least one allele based on genotyping.

<sup>a</sup> -, not observed; +, smaller than wild type pigs ( $\leq 15$  mm); ++, similar to wild type pigs (15 mm to 25 mm).

<sup>b</sup> MLN, mesenteric lymph nodes; -, not observed; +, less than wild type pigs; ++, similar to wild type pigs.

<sup>c</sup> IPP, ileal Peyer's patches; -, not observed; +, poorly developed and unstructured small IPP.

<sup>d</sup> Pigs used in this study were blood-typed as A<sup>+</sup> or H<sup>+</sup> by PCR and/or immunofluorescence assay.

<sup>e</sup> ND, lymphocytes were not detected in thymus as indicated by H&E staining, only epithelial components were observed.

**Supplementary Table 6. Primers and HuNoV qRT-PCR probe used in this study.**

| Name                                                                                             | Sequence (5'- 3')                                          | Product size |
|--------------------------------------------------------------------------------------------------|------------------------------------------------------------|--------------|
| <b>To introduce sgRNA into px330</b>                                                             |                                                            |              |
| RAG2 F1                                                                                          | CAC CGT ATA GTC GAG GGA AAA GTA                            |              |
| RAG2 R1                                                                                          | AAA CTA CTT TTC CCT CGA CTA TAC                            |              |
| RAG2 F2                                                                                          | CAC CGA AGG CAG ATA TGG TCA TTC                            |              |
| RAG2 R2                                                                                          | AAA CGA ATG ACC ATA TCT GCC TTC                            |              |
| IL2RG F1                                                                                         | CAC CGG AAA CGG TTG AGA GTC CCA                            |              |
| IL2RG R1                                                                                         | AAA CCT GGG ACT CTC AAC GTT TCC                            |              |
| IL2RG F2                                                                                         | CAC CGT GGA AAC GTT GAG AGT CCC                            |              |
| IL2RG R2                                                                                         | AAA CGG GAC TCT CAA CGT TTC CAC                            |              |
| <b>To generate template DNA for <i>in vitro</i> transcription of sgRNA and mRNA form of Cas9</b> |                                                            |              |
| T7 RAG2 F1                                                                                       | TTA ATA CGA CTC ACT ATA GGT ATA GTC GAG GGA AAA GTA        |              |
| T7 RAG2 F2                                                                                       | TTA ATA CGA CTC ACT ATA GGA AGG CAG ATA TGG TCA TTC        |              |
| T7 IL2RG F1                                                                                      | TTA ATA CGA CTC ACT ATA GGG AAA CGG TTG AGA GTC CCA        |              |
| T7 IL2RG F2                                                                                      | TTA ATA CGA CTC ACT ATA GGT GGA AAC GTT GAG AGT CCC        |              |
| T7 sgRNA R1                                                                                      | AAA AGC ACC GAC TCG GTG CC                                 |              |
| Cas9 F                                                                                           | TAA TAC GAC TCA CTA TAG GGA GAA TGG ACT ATA AGG ACC ACG AC |              |
| Cas9 R                                                                                           | GCG AGC TCT AGG AAT TCT TAC                                |              |
| <b>To genotype RAG2 and IL2RG mutations introduced by CRISPR/Cas9 system</b>                     |                                                            |              |
| RAG2 F                                                                                           | AAG GAT TCC TGC TAC CTT CCT CCT                            | 426bp        |
| RAG2 R                                                                                           | AGA TAG CCC ATC TTG AAG TTC TGG                            |              |
| IL2RG F                                                                                          | CTG GAC TAT TAG AAG GAT GTG GGC                            | 417bp        |
| IL2RG R                                                                                          | ATA TAG TGG GAA GCC TGG GAT GCT                            |              |
| IL2RG extend F                                                                                   | GAT TAA CAC CTA ATC TCC CAG AGG ATT TAG CCT GTG TC         | 1017bp       |
| IL2RG extend R                                                                                   | CCT CTT TTC CAA ACC AAC AGC CAG AAG TGA TC                 |              |
| <b>HBGA typing of pigs</b>                                                                       |                                                            |              |
| ABO4s                                                                                            | AGCTGTTCTGGAGACAGCGGAGA                                    | 500bp        |
| ABO5a                                                                                            | CAGGTGGCTCTCATCATGCCACAC                                   |              |
| Pig5                                                                                             | CCCTGGA ACTCTGCCACTGTC                                     | 300bp        |
| Pig3                                                                                             | CTGCACGTAGCACCAGGGTCT                                      |              |
| <b>To detect HuNoV genomes</b>                                                                   |                                                            |              |
| COG2F                                                                                            | CARGARBCNATGTTYAGRTGGATGAG                                 |              |
| COG2R                                                                                            | TCGACGCCATCTTCATTCACA                                      |              |
| probe RING2                                                                                      | /56-FAM/TGGGAGGGCGATCGCAATCT/3BHQ1/                        |              |
